# Supplementary material
Source: PubMed Central journal article supplement (PMC8506134)

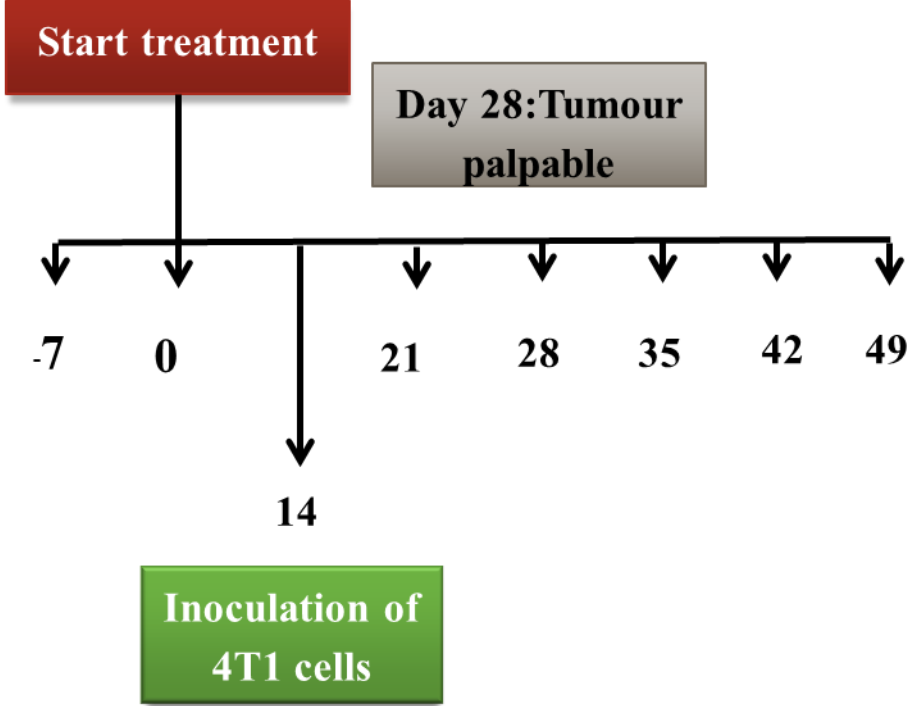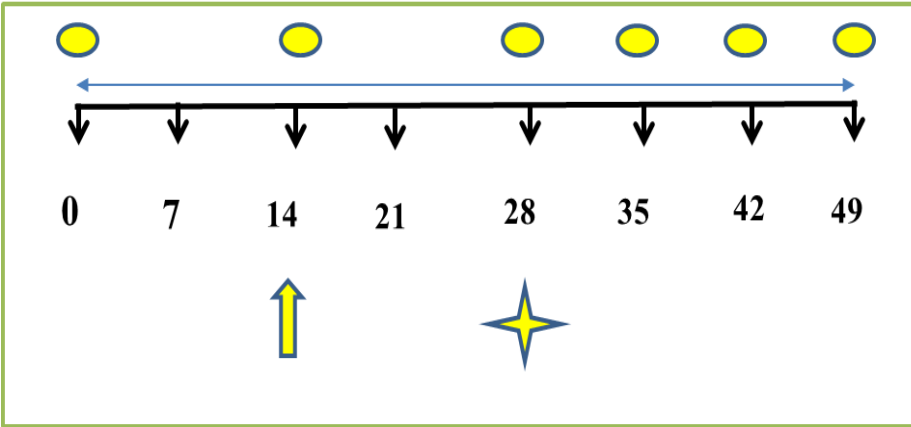

- Inoculation of 4T1 cells
- Tumour palpable
- Mice sacrifice
- Feeding duration



Body weight measurements from preliminary study

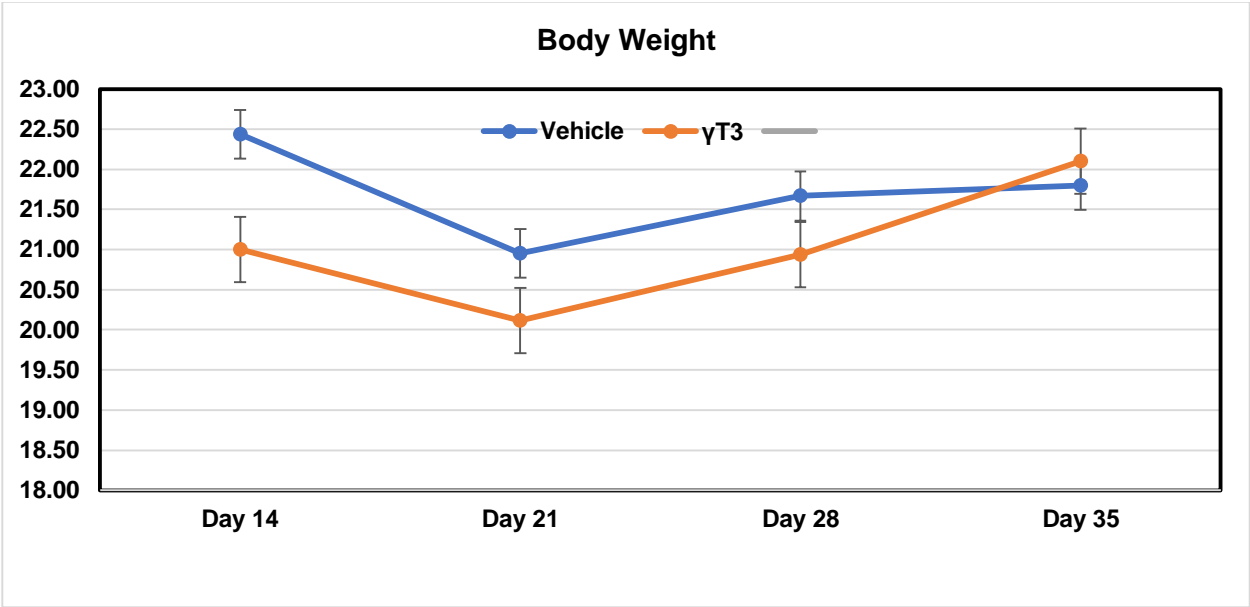

Body weight measurement from a preliminary study. Each time point represents mean  $\pm$  SE for 5-6 mice per time-point

Functional gene grouping for T-helper cell differentiation array

| Groups                                | Genes                                                                                                                                                                                                     |
|---------------------------------------|-----------------------------------------------------------------------------------------------------------------------------------------------------------------------------------------------------------|
| <b>Cytokines &amp; Receptors</b>      | <i>CCL5 (RANTES), CCL7 (MCP-3), CCR3, CCR4, CCR5, CCR6, IL12B, IL12RB2, IL13, IL13RA1, IL17A, IL17RE, IL18, IL18R1, IL18RAP, IL1R1, IL1R2, IL1RL1, IL2, IL21, IL2RA, IL4, IL4R, IL5, IL9, TNF</i>         |
| <b>Th1 markers</b>                    | <i>CCR5, HAVCR2, IGSF6, IL12B, IL18, IRF1, SOCS1, SOCS5, TLR4, TLR6, TNF</i>                                                                                                                              |
| <b>Th2 markers</b>                    | <i>CCL5 (RANTES), CCL7 (MCP-3), CCR3, CCR4, CEBPB, GF11, GPR44, ICOS, IL13RA1, IL4R, JAK1, NFATC1, NFATC2</i>                                                                                             |
| <b>Transcription Factors</b>          | <i>CEBPB, FOSL (FRA-1)1, FOXP3, GATA3, GATA4, HOXA10, HOXA3, ID2, IRF4, IRF8, MAF, NFATC1, NFATC2, NR4A1, NR4A3, POU2F2, REL, RELB, RORA, RORC, RUNX1 (AML1), RUNX3, STAT1, STAT4, STAT6, TOX, ZBTB7B</i> |
| <b>Epigenetically Regulated Genes</b> | <b>Th1 cells:</b> <i>EOMES, IFNG, IL12RB2, IL18R1, IL18RAP, FASLG (TNFSF6), TBX21.</i>                                                                                                                    |
|                                       | <b>Th2 cells:</b> <i>ASB2, GATA3, IL13, IL1RL1, IL4, IL5, PPARG</i>                                                                                                                                       |
|                                       | <b>Th17 cells:</b> <i>IL17A, IL17RE, IL1R1, IL21, RORA, RORC</i>                                                                                                                                          |
|                                       | <b>T-Regulatory cells (iTreg and nTreg):</b> <i>CCR6, FOSL1 (FRA-1), FOXP3, IKZF2, IL9, IRF4, IRF8, MYB, NR4A1, NR4A3, POU2F2, REL, RELB, TGIF1, TNFSF11.</i>                                             |
|                                       | <b>Conventional Th versus Treg cells:</b> <i>CACNA1F, CHD7, FOXP3, GATA4, HOPX, HOXA10, HOXA3, ID2, IKZF2, IL1R2, IL2RA, KIF2C, LRRC32, PERP, PKD2, TNFRSF9, TP53INP1, UTS2</i>                           |

**iTreg:** inducible T-regulatory; **nTreg:** natural T-regulatory; **Th:** T-helper; **Treg:** T-regulatory;

Scatter Plot

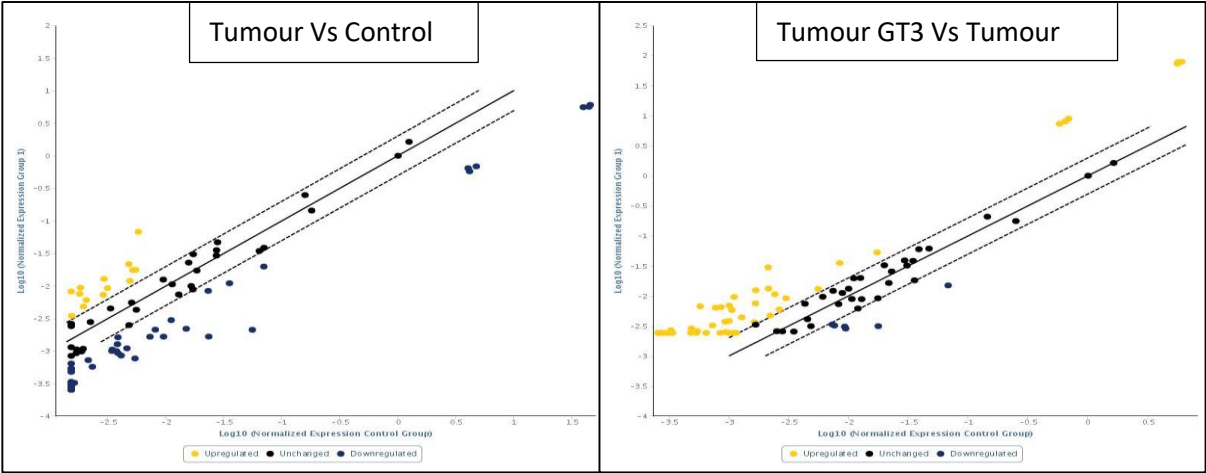

Supplement: CEI-206-161-s001.pdf [file CEI-206-161-s001.pdf]
